# Supplementary material for: Eicosapentaenoic Acid (EPA) Modulates Glucose Metabolism by Targeting AMP-Activated Protein Kinase (AMPK) Pathway
Source: PubMed Central journal article supplement (PMC6801536; doi:10.3390/ijms20194751), 2019-09-25
Supplement: ijms-20-04751-s001.pdf [file ijms-20-04751-s001.pdf]

## **Eicosapentaenoic Acid (EPA) Modulates Glucose Metabolism by Targeting AMP-activated Protein Kinase (AMPK) pathway**

Nami Kim‡, Mi Sun Kang‡, Miso Nam‡, Shin Ae Kim§, Geum-Sook Hwang‡¶\*, and Hyeon Soo Kim§\*

‡Western Seoul Center, Korea Basic Science Institute, Seoul 120-140, Republic of Korea

§Department of Anatomy, Korea University College of Medicine, Seoul 136-701, Republic of Korea

¶Chemistry & Nanoscience, Ewha Womans University, Seoul 120-750, Republic of Korea

\*Corresponding authors: Hyeon Soo Kim, MD, PhD, 126-1 Anam-dong 5-ga, Seongbuk-gu, Seoul, Korea. Tel: 82-2-2286-1151; Fax: 82-2-929-5696; E-mail: anatomykim@korea.ac.kr

Geum-Sook Hwang, PhD, 2-203 Shinchon-dong, Seodaemun-gu, Seoul, Korea. Tel: 82-2-6908-6200; Fax: 82-2-6908-6239; E-mail: gshwang@kbsi.re.kr

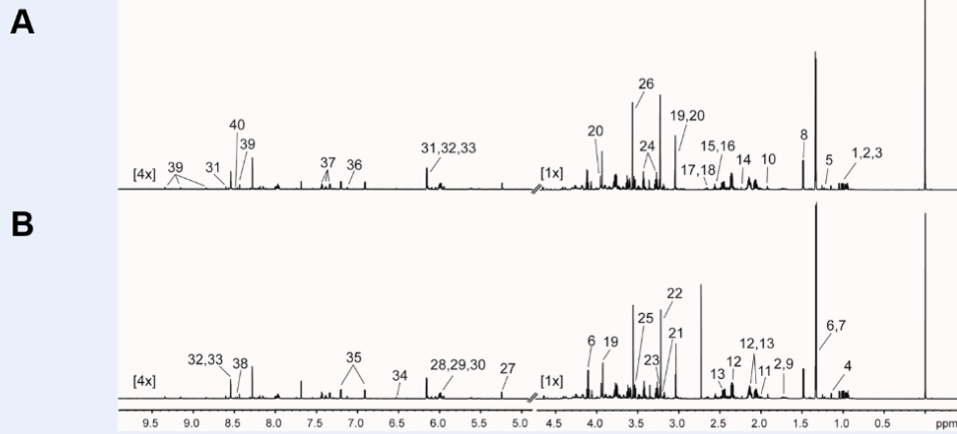

Supplementary Fig. 1

Supplementary Table 1

| Metabolite         | Concentration mean $\pm$ SD ( $\mu$ M) |                    |         |
|--------------------|----------------------------------------|--------------------|---------|
|                    | Control                                | EPA                | p-value |
| valine             | 19.66 $\pm$ 0.63                       | 22.86 $\pm$ 0.53   | <0.001  |
| leucine            | 20.9 $\pm$ 0.51                        | 23.32 $\pm$ 0.37   | <0.001  |
| isoleucine         | 21.6 $\pm$ 0.64                        | 25 $\pm$ 0.48      | <0.001  |
| propylene glycol   | 24.72 $\pm$ 16.25                      | 16.16 $\pm$ 5.48   | 0.297   |
| ethanol            | 2.22 $\pm$ 0.2                         | 2.2 $\pm$ 0.1      | 0.849   |
| lactate            | 382.5 $\pm$ 28.53                      | 493.18 $\pm$ 12.95 | <0.001  |
| threonine          | 75.64 $\pm$ 1.55                       | 79.76 $\pm$ 1.42   | 0.002   |
| alanine            | 98.52 $\pm$ 3.5                        | 98.3 $\pm$ 2.16    | 0.908   |
| lysine             | 12.02 $\pm$ 0.58                       | 13.38 $\pm$ 0.31   | 0.002   |
| acetate            | 4.98 $\pm$ 0.81                        | 5.76 $\pm$ 0.25    | 0.074   |
| proline            | 16.64 $\pm$ 1.29                       | 17.02 $\pm$ 0.26   | 0.535   |
| glutamate          | 288.58 $\pm$ 9.72                      | 286.96 $\pm$ 8.96  | 0.791   |
| glutamine          | 172.6 $\pm$ 8.54                       | 199.62 $\pm$ 3.04  | <0.001  |
| acetone            | 1.98 $\pm$ 0.04                        | 2 $\pm$ 0.07       | 0.608   |
| glutathione        | 19.5 $\pm$ 1.01                        | 6.54 $\pm$ 0.89    | <0.001  |
| $\beta$ -alanine   | 26.94 $\pm$ 0.95                       | 26.78 $\pm$ 0.51   | 0.748   |
| methionine         | 7.62 $\pm$ 0.19                        | 9 $\pm$ 0.16       | <0.001  |
| malate             | 13.62 $\pm$ 0.18                       | 12.88 $\pm$ 0.68   | 0.046   |
| creatine           | 67.3 $\pm$ 2.24                        | 70 $\pm$ 4.18      | 0.236   |
| creatine phosphate | 32.94 $\pm$ 2.92                       | 30.08 $\pm$ 3.84   | 0.222   |

  

| Metabolite                  | Concentration mean $\pm$ SD ( $\mu$ M) |                   |         |
|-----------------------------|----------------------------------------|-------------------|---------|
|                             | Control                                | EPA               | p-value |
| choline                     | 0.74 $\pm$ 0.15                        | 0.86 $\pm$ 0.23   | 0.359   |
| O-phosphocholine            | 75.72 $\pm$ 1.79                       | 71.64 $\pm$ 2.1   | 0.011   |
| sn-glycero-3-phosphocholine | 7.34 $\pm$ 0.36                        | 8.62 $\pm$ 0.13   | <0.001  |
| taurine                     | 100.08 $\pm$ 3.49                      | 99.54 $\pm$ 2.03  | 0.772   |
| myo-inositol                | 76.9 $\pm$ 2.25                        | 78.06 $\pm$ 2.65  | 0.477   |
| glycine                     | 171.64 $\pm$ 6.23                      | 180.38 $\pm$ 4.84 | 0.038   |
| glucose                     | 44.66 $\pm$ 4.12                       | 47.32 $\pm$ 4.46  | 0.356   |
| UDP-glucose                 | 8.62 $\pm$ 0.24                        | 8.4 $\pm$ 0.3     | 0.235   |
| UDP-galactose               | 5.86 $\pm$ 0.15                        | 5.4 $\pm$ 0.2     | 0.003   |
| UDP-glucuronate             | 4.56 $\pm$ 0.24                        | 4.08 $\pm$ 0.23   | 0.012   |
| AMP                         | 3.28 $\pm$ 0.63                        | 5.58 $\pm$ 0.99   | 0.002   |
| ADP                         | 16.56 $\pm$ 1.16                       | 19.2 $\pm$ 1.28   | 0.009   |
| ATP                         | 47.58 $\pm$ 2.61                       | 41.76 $\pm$ 2.53  | 0.007   |
| Fumarate                    | 0.66 $\pm$ 0.55                        | 0.6 $\pm$ 0.07    | 0.172   |
| tyrosine                    | 14.42 $\pm$ 0.44                       | 16.64 $\pm$ 0.54  | <0.001  |
| histidine                   | 4.4 $\pm$ 0.23                         | 5.14 $\pm$ 0.19   | 0.001   |
| phenylalanine               | 12.1 $\pm$ 0.4                         | 13.94 $\pm$ 0.15  | <0.001  |
| formate                     | 2.56 $\pm$ 0.46                        | 2.32 $\pm$ 0.33   | 0.374   |
| NAD+                        | 6.14 $\pm$ 0.32                        | 6.18 $\pm$ 0.13   | 0.803   |
| NADH                        | 1.52 $\pm$ 0.41                        | 1.42 $\pm$ 0.33   | 0.681   |
